# Supplementary material for: Silver(i)–organic frameworks assembled with flexible supramolecular synthons with a pendant ethynide arm attached to the heteroaryl skeleton
Source: Royal Society of Chemistry journal article supplement (doi:10.1039/c3ce41752b), 2013-12-06
Supplement: c3ce41752b.pdf [file c3ce41752b.pdf]

## Supporting Information

# **Silver(I)–organic frameworks assembled with flexible supramolecular synthons with pendant ethynide arm attached to heteroaryl skeleton**

**Bo Li,<sup>a,b</sup> Ren-Wu Huang,<sup>a</sup> Hong-Chang Yao,<sup>a</sup> Shuang-Quan Zang,<sup>\*,a</sup> and Thomas C. W. Mak<sup>\*,a,c</sup>**

<sup>a</sup>College of Chemistry and Molecular Engineering, Zhengzhou University, Zhengzhou 450001, People's Republic of China

<sup>b</sup>College of Chemistry and Pharmaceutical Engineering, Nanyang Normal University, Nanyang 473061, P. R. China

<sup>c</sup>Department of Chemistry and Center of Novel Functional Molecules, The Chinese University of Hong Kong, Shatin, New Territories, Hong Kong SAR, People's Republic of China

Author for correspondence: Dr. S.-Q. Zang, E-mail: [zangsqzg@zzu.edu.cn](mailto:zangsqzg@zzu.edu.cn);

**This PDF file includes Table S1 and S2.**

**Table S1.** X-ray Crystal Data and Structure Refinement for Complexes 1–4.

**Table S2.** Selected Bond Lengths (Å) for Complexes 1–4.

**Table S1.** X-ray Crystal Data and Structure Refinement for Complexes **1–4**.

|                                                                         | <b>1</b>                                                                                     | <b>2</b>                                                                                      | <b>3</b>                                                                                                       | <b>4</b>                                                                                      |
|-------------------------------------------------------------------------|----------------------------------------------------------------------------------------------|-----------------------------------------------------------------------------------------------|----------------------------------------------------------------------------------------------------------------|-----------------------------------------------------------------------------------------------|
| formula                                                                 | C <sub>17</sub> H <sub>6</sub> Ag <sub>5</sub> F <sub>12</sub> N <sub>3</sub> O <sub>9</sub> | C <sub>17</sub> H <sub>8</sub> Ag <sub>5</sub> F <sub>12</sub> N <sub>3</sub> O <sub>10</sub> | C <sub>83</sub> H <sub>46</sub> Ag <sub>14</sub> F <sub>30</sub> N <sub>4</sub> O <sub>27</sub> S <sub>4</sub> | C <sub>70</sub> H <sub>58</sub> Ag <sub>9</sub> N <sub>9</sub> O <sub>22</sub> S <sub>7</sub> |
| fw                                                                      | 1163.60                                                                                      | 1181.61                                                                                       | 3739.66                                                                                                        | 2572.50                                                                                       |
| cryst syst                                                              | triclinic                                                                                    | monoclinic                                                                                    | monoclinic                                                                                                     | monoclinic                                                                                    |
| space group                                                             | <i>P</i> $\bar{1}$                                                                           | <i>P</i> 2/ <i>c</i>                                                                          | <i>P</i> 2 <sub>1</sub> / <i>c</i>                                                                             | <i>C</i> <i>c</i>                                                                             |
| <i>a</i> (Å)                                                            | 8.9041(8)                                                                                    | 16.0991(16)                                                                                   | 8.0193(16)                                                                                                     | 15.346(3)                                                                                     |
| <i>b</i> (Å)                                                            | 11.5928(7)                                                                                   | 8.8039(10)                                                                                    | 24.904(5)                                                                                                      | 24.558(5)                                                                                     |
| <i>c</i> (Å)                                                            | 14.2517(10)                                                                                  | 23.399(3)                                                                                     | 26.491(5)                                                                                                      | 22.739(5)                                                                                     |
| $\alpha$ (deg)                                                          | 71.388(6)                                                                                    | 90                                                                                            | 90                                                                                                             | 90                                                                                            |
| $\beta$ (deg)                                                           | 81.390(7)                                                                                    | 120.917(7)                                                                                    | 93.01(3)                                                                                                       | 109.46(3)                                                                                     |
| $\gamma$ (deg)                                                          | 88.826(6)                                                                                    | 90                                                                                            | 90                                                                                                             | 90                                                                                            |
| volume (Å <sup>3</sup> )                                                | 1377.88(2)                                                                                   | 2845.2(6)                                                                                     | 5283.4(2)                                                                                                      | 8080(3)                                                                                       |
| <i>Z</i>                                                                | 2                                                                                            | 4                                                                                             | 2                                                                                                              | 4                                                                                             |
| <i>D</i> <sub>calc</sub> (g·cm <sup>-3</sup> )                          | 2.805                                                                                        | 2.758                                                                                         | 2.351                                                                                                          | 2.115                                                                                         |
| <i>F</i> (000)                                                          | 1088                                                                                         | 2216                                                                                          | 3560                                                                                                           | 5008                                                                                          |
| <i>R</i> (int)                                                          | 0.0231                                                                                       | 0.0542                                                                                        | 0.0878                                                                                                         | 0.0358                                                                                        |
| GOF                                                                     | 1.065                                                                                        | 1.006                                                                                         | 1.116                                                                                                          | 1.081                                                                                         |
| <i>R</i> <sub>1</sub> <sup><i>a</i></sup> [ <i>I</i> > 2σ( <i>I</i> )]  | 0.0511                                                                                       | 0.0884                                                                                        | 0.0988                                                                                                         | 0.0763                                                                                        |
| <i>wR</i> <sub>2</sub> <sup><i>b</i></sup> [ <i>I</i> > 2σ( <i>I</i> )] | 0.1309                                                                                       | 0.1675                                                                                        | 0.2915                                                                                                         | 0.2095                                                                                        |
| <i>R</i> <sub>1</sub> <sup><i>a</i></sup> (all data)                    | 0.0620                                                                                       | 0.1510                                                                                        | 0.1170                                                                                                         | 0.0827                                                                                        |
| <i>wR</i> <sub>2</sub> <sup><i>b</i></sup> (all data)                   | 0.1380                                                                                       | 0.1955                                                                                        | 0.3087                                                                                                         | 0.2161                                                                                        |

<sup>*a*</sup>*R*<sub>1</sub> = Σ||*F*<sub>o</sub>|| - ||*F*<sub>c</sub>|| / Σ||*F*<sub>o</sub>||; <sup>*b*</sup>*wR*<sub>2</sub> = {Σ[*w*(*F*<sub>o</sub><sup>2</sup> - *F*<sub>c</sub><sup>2</sup>)<sup>2</sup>] / Σ[*w*(*F*<sub>o</sub><sup>2</sup>)<sup>2</sup>]}<sup>1/2</sup>, *w* = [σ<sup>2</sup>(*F*<sub>o</sub><sup>2</sup>) + (*AP*)<sup>2</sup> + *BP*]<sup>-1</sup>, where *P* = [Max(*F*<sub>o</sub><sup>2</sup>, 0) + 2*F*<sub>c</sub><sup>2</sup>]/3, and *A* and *B* are constants adjusted by the program.

**Table S2.** Selected Bond Lengths (Å) for Complexes 1–4.

| 1           |           |             |           |             |           |
|-------------|-----------|-------------|-----------|-------------|-----------|
| C1≡C2       | 1.202(7)  | Ag1–C1      | 2.240(7)  | Ag2–C1      | 2.287(7)  |
| Ag3–C1      | 2.371(8)  | Ag3–C2      | 2.934(8)  | Ag4–C1      | 2.324(8)  |
| Ag4–C2      | 2.698(8)  | Ag1⋯Ag2     | 2.812(9)  | Ag1⋯Ag3     | 2.917(10) |
| Ag1⋯Ag4     | 3.005(10) | Ag2⋯Ag2#2   | 2.812(1)  | Ag2⋯Ag3     | 3.030(11) |
| Ag2⋯Ag4     | 3.153(10) | Ag6⋯Ag6#3   | 3.038(3)  |             |           |
| 2           |           |             |           |             |           |
| C1≡C2       | 1.206(1)  | Ag1–C1      | 2.562(2)  | Ag2–C1      | 2.655(2)  |
| Ag1#1–C1    | 2.340(2)  | Ag2#1–C1    | 2.28(2)   | Ag4#2–C1    | 2.261(2)  |
| Ag4#2–C2    | 3.066(2)  | Ag1⋯Ag1#1   | 2.962(3)  | Ag1⋯Ag4#2   | 3.176(2)  |
| Ag1#1⋯Ag4#2 | 2.904(3)  | Ag2#1⋯Ag4#2 | 2.936(2)  | Ag1#1⋯Ag5#1 | 3.049(2)  |
| Ag2#1⋯Ag5#1 | 3.024(3)  |             |           |             |           |
| 3           |           |             |           |             |           |
| C1≡C2       | 1.205(9)  | Ag1–C1      | 2.375(1)  | Ag1–C2      | 2.484(1)  |
| Ag2–C3      | 2.188(1)  | Ag3–C3      | 2.175(2)  | Ag4–C1      | 2.304(1)  |
| Ag4–C3      | 2.467(2)  | Ag5–C1      | 2.162(1)  | Ag6–C3      | 2.410(1)  |
| Ag6–C4      | 2.496(1)  | Ag7–C1      | 2.299(1)  | Ag7–C2      | 2.884(1)  |
| Ag1⋯Ag5     | 3.153(2)  | Ag2⋯Ag3     | 2.842(2)  | Ag2⋯Ag4     | 2.843(2)  |
| Ag2⋯Ag6     | 3.399(2)  | Ag3⋯Ag4     | 3.001(2)  | Ag3⋯Ag6     | 3.131(2)  |
| Ag4⋯Ag5     | 2.804(2)  | Ag4⋯Ag7     | 2.980(2)  | Ag5⋯Ag7     | 2.958(2)  |
| 4           |           |             |           |             |           |
| C1≡C2       | 1.212(10) | C4≡C5       | 1.211(10) | C7≡C8       | 1.202(10) |
| C10≡C11     | 1.208(10) | Ag1–C1      | 2.077(2)  | Ag1–C7      | 2.130(2)  |
| Ag2–C4      | 2.108(3)  | Ag2–C10     | 2.11(2)   | Ag3–C10     | 2.36(3)   |
| Ag3–C11     | 2.52(2)   | Ag4–C1      | 2.34(2)   | Ag4–C2      | 2.42(3)   |
| Ag5–C7      | 2.40(2)   | Ag5–C8      | 2.65(2)   | Ag6–C4      | 2.321(3)  |
| Ag6–C5      | 2.43(2)   | Ag7–C7      | 2.18(3)   | Ag7–C8      | 2.794(2)  |
| Ag7–C10     | 2.14(3)   | Ag7–C11     | 2.799(2)  | Ag8–C7      | 2.47(3)   |
| Ag8–C8      | 2.68(2)   | Ag9–C1      | 2.31(2)   | Ag9–C2      | 2.836(3)  |
| Ag1⋯Ag4     | 3.277(9)  | Ag1⋯Ag5     | 3.185(3)  | Ag1⋯Ag7     | 3.018(9)  |
| Ag1⋯Ag8     | 3.214(3)  | Ag1⋯Ag9     | 2.935(3)  | Ag2⋯Ag3     | 3.313(9)  |
| Ag2⋯Ag7     | 2.864(3)  | Ag2⋯Ag9     | 2.956(10) |             |           |

<sup>a</sup>Symmetry transformations used to generate equivalent atoms: #2 2 – x, 1 – y, – z; #3 2 – x, 2 – y, – z for **1**, #1 1 – x, – y, 2 – z; #2 x, – 1 + y, z for **2**.
